# Supplementary material for: Phase change in subducted lithosphere, impulse, and quantizing Earth surface deformations
Source: Copernicus journal article supplement (doi:10.5194/se-6-1075-2015), 2015-09-23
Supplement: Supplementary file 1 [file se-6-1075-2015-supplement.zip]

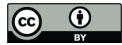

## *Supplement of*

# **Phase change in subducted lithosphere, impulse, and quantizing Earth surface deformations**

**C. O. Bowin et al.**

*Correspondence to:* C. O. Bowin ([cbowin@whoi.edu](mailto:cbowin@whoi.edu))

- [se-6-1075-2015-supplement-title-page.pdf](#)
- [C5\\_ph52\\_slgt\\_ta\\_fg100\\_d31\\_464\\_s\\_plates\\_Large\\_2c.pdf](#)
- [goco03s.gfc](#)
- [goco03s\\_1a.shc](#)
- [goco3s\\_wneg3.shc](#)

The copyright of individual parts of the supplement might differ from the CC-BY 3.0 licence.
